# Supplementary figures and images for: Protective effect of polysaccharides fractions from Sijunzi decoction in reserpine-induced spleen deficiency rats
Source: Royal Society of Chemistry journal article supplement (doi:10.1039/c6ra06361f), 2016-01-01

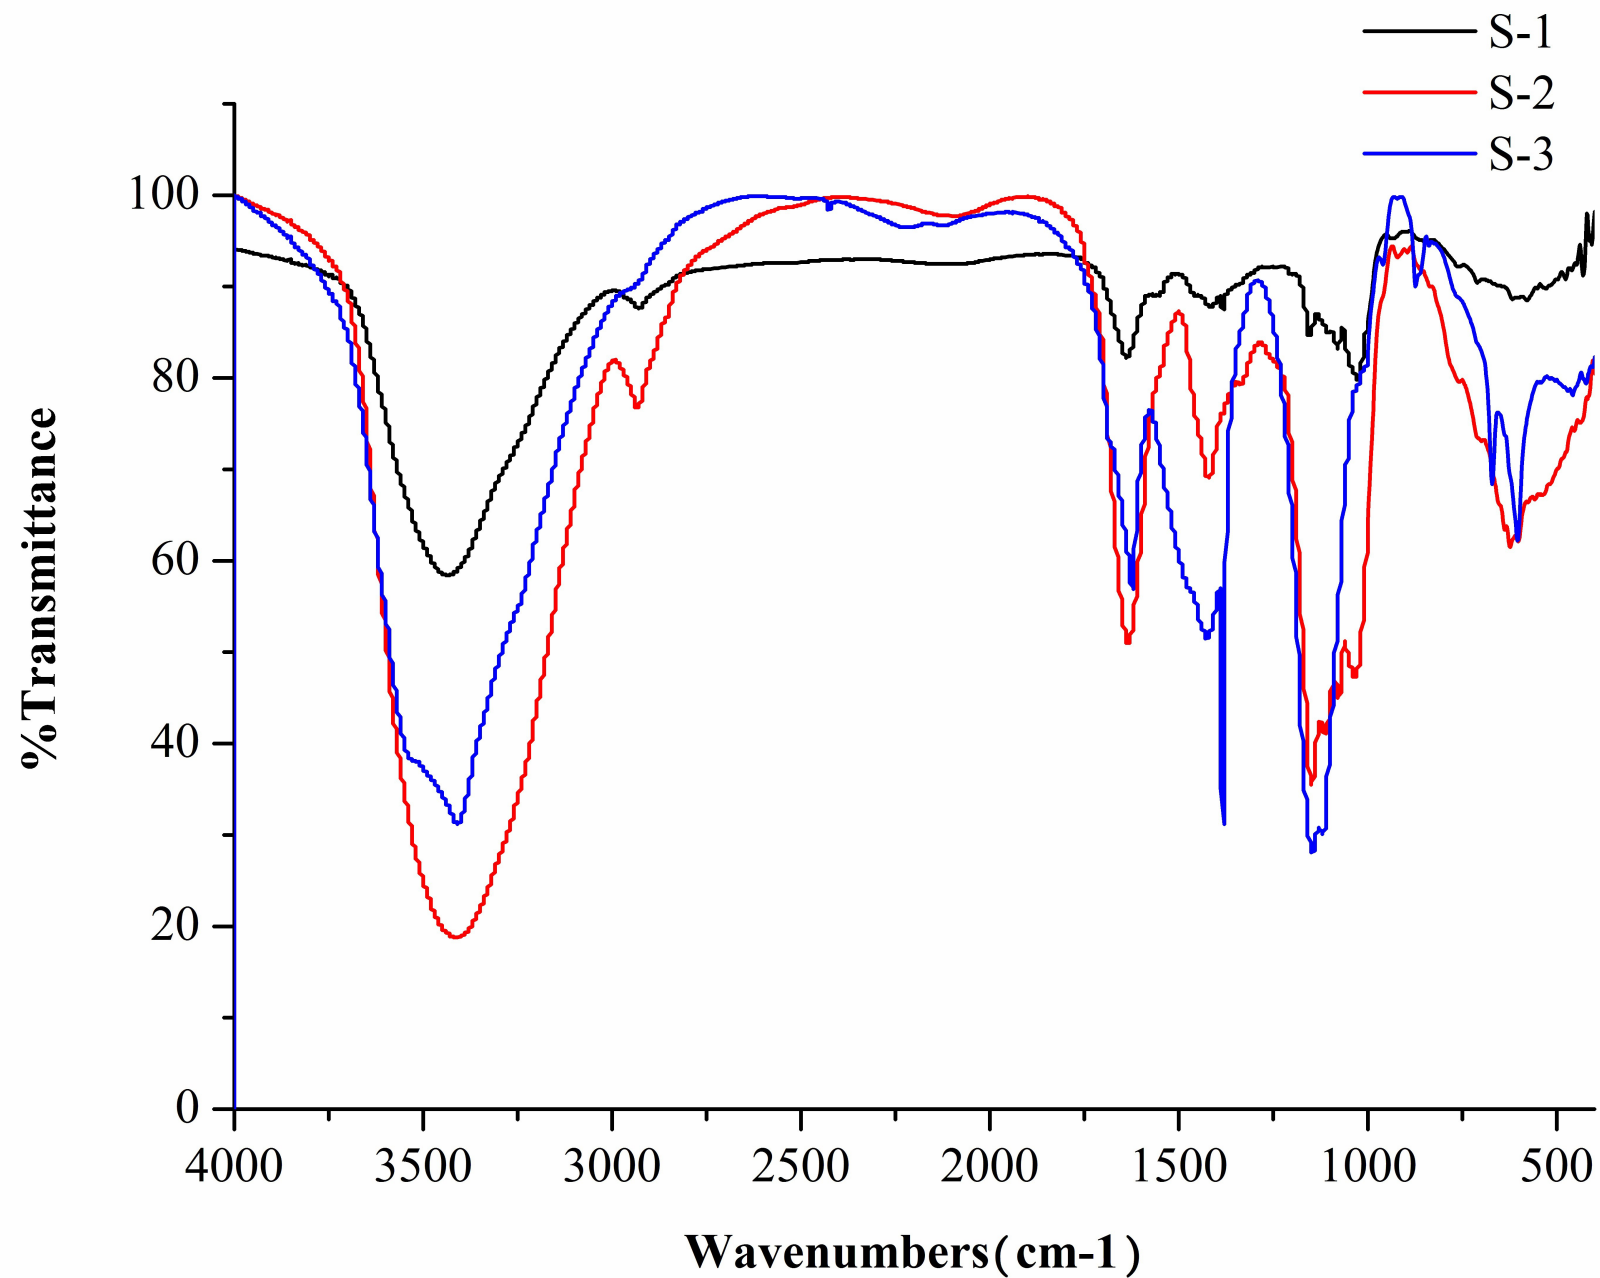

Supplement: c6ra06361f1.pdf [file c6ra06361f1.pdf]
